# Supplementary material for: Searching for Biomarkers in the Blood of Patients at Risk of Developing Parkinson’s Disease at the Prodromal Stage
Source: MDPI journal article supplement (doi:10.3390/ijms24031842), 2023-01-17
Supplement: s1 [file s1]

Table S1. Insignificant correlations in the risc group of patients.

|                      | RBDSQ               | Odor<br>identification<br>score | SCOPA-<br>AUT       | UPDRS               | Anxiety<br>(HADS)    | Depression<br>(HADS) | Starkstein<br>Apathy<br>Scale<br>(SAS) | Fatigue<br>Severity<br>Scale | MoCA                    | The<br>Epworth<br>Sleepiness<br>Scale |
|----------------------|---------------------|---------------------------------|---------------------|---------------------|----------------------|----------------------|----------------------------------------|------------------------------|-------------------------|---------------------------------------|
| RBDSQ                |                     | -0.2695<br>P= 0.183             | -0.1051<br>P= 0.609 | -0.1804<br>P= 0.378 | 0.0699<br>P= 0.734   | -0.0663<br>P= 0.748  | 0.0723<br>P= 0.726                     |                              | -<br>0.1493<br>P= 0.476 | -0.0847<br>P= 0.774                   |
| SST                  | -0.2695<br>P= 0.183 |                                 | 0.0026<br>P= 0.990  | -0.2338<br>P= 0.250 | -0.1453<br>P= 0.479  | 0.0329<br>P= 0.873   | -0.3589<br>P= 0.072                    | -0.1984<br>P= 0.331          | 0.2914<br>P= 0.158      | 0.1007<br>P= 0.732                    |
| SCOPA-AUT            | -0.1051<br>P= 0.609 | 0.0026<br>P= 0.990              |                     | 0.2551<br>P= 0.208  | -0.2196<br>P= 0.281  | -0.2658<br>P= 0.189  | 0.0443<br>P= 0.830                     | -0.1922<br>P= 0.347          | 0.0904<br>P= 0.668      | 0.3567<br>P= 0.211                    |
| UPDRS                | -0.1804<br>P= 0.378 | -0.2338<br>P= 0.250             | 0.2551<br>P= 0.208  |                     | -0.3881<br>P= 0.050  | -0.1045<br>P= 0.612  | 0.3741<br>P= 0.060                     | 0.2727<br>P= 0.178           | -<br>0.0406<br>P= 0.847 | 0.3224<br>P= 0.261                    |
| Anxiety<br>(HADS)    | 0.0699<br>P= 0.734  | -0.1453<br>P= 0.479             | -0.2196<br>P= 0.281 | -0.3881<br>P= 0.050 |                      |                      | r-0.0667<br>P= 0.746                   | 0.0818<br>P= 0.691           | 0.1033<br>P= 0.623      |                                       |
| Depression<br>(HADS) | -0.0663<br>P= 0.748 | 0.0329<br>P= 0.873              | -0.2658<br>P= 0.189 | -0.1045<br>P= 0.612 |                      |                      |                                        | 0.0635<br>P= 0.758           | -<br>0.0411<br>P= 0.845 | -0.1288<br>P= 0.661                   |
| (SAS)                | 0.0723<br>P= 0.726  | -0.3589<br>P= 0.072             | 0.0443<br>P= 0.830  | 0.3741<br>P= 0.060  | r-0.0667<br>P= 0.746 |                      |                                        | 0.2575<br>P= 0.204           | -<br>0.2054<br>P= 0.325 | 0.2105<br>P= 0.470                    |
| FSS                  |                     | -0.1984<br>P= 0.331             | -0.1922<br>P= 0.347 | 0.2727<br>P= 0.178  | 0.0818<br>P= 0.691   | 0.0635<br>P= 0.758   | 0.2575<br>P= 0.204                     |                              |                         | -0.0399<br>P= 0.892                   |
| MoCA                 | -0.1493<br>P= 0.476 | 0.2914<br>P= 0.158              | 0.0904<br>P= 0.668  | -0.0406<br>P= 0.847 | 0.1033<br>P= 0.623   | -0.0411<br>P= 0.845  | -0.2054<br>P= 0.325                    |                              |                         | -0.1483<br>P= 0.613                   |
| ESS                  | -0.0847<br>P= 0.774 | 0.1007<br>P= 0.732              | 0.3567<br>P= 0.211  | 0.3224<br>P= 0.261  |                      | -0.1288<br>P= 0.661  | 0.2105<br>P= 0.470                     | -0.0399<br>P= 0.892          | -<br>0.1483<br>P= 0.613 |                                       |

ESS - the Epworth Sleepiness Scale; FSS - Fatigue Severity Scale; HADS - the Hospital Anxiety and Depression Scale; MoCA - Montreal Cognitive Assessment; RBDSQ - the REM sleep behavior disorder screening questionnaire; SCOPA-AUT - Scales for Outcomes in Parkinson's Disease - Autonomic Dysfunction; SST - Sniffin'Sticks Test; SAS - Starkstein Apathy Scale; UPDRS - Unified Parkinson's Disease Rating Scale.

Table S2. Concentrations of monoamines and some metabolites in plasma of patients in control group and in risk group for developing Parkinson's disease.

| Concentration,<br>pmol/ml<br>Substance | Control group | Risk group   | P      |
|----------------------------------------|---------------|--------------|--------|
| NA                                     | 2.08±0.25     | 1.84±0.28    | 0.3390 |
| DOPAC                                  | 9.51±1.26     | 10.97±1.99   | 0.6883 |
| 3-OMD                                  | 91.95±12.23   | 93.9±10.29   | 0.9803 |
| 5-HIAA                                 | 41.1±5.51     | 51.62±5.78   | 0.3629 |
| 5-HTP                                  | 2.67±0.83     | 8.92±2.44    | 0.0914 |
| HVA                                    | 119.34±23.37  | 101.27±11.08 | 0.7068 |
| 3-MT                                   | 69.74±11.08   | 65.34±14.78  | 0.6412 |
| 5-HT                                   | 22.73±7.28    | 20.31±3.78   | 0.9773 |

DA - dopamine; DOPAC - 3,4-Dihydroxyphenylacetic acid; HVA - homovanillic acid; 5-HIAA - 5-Hydroxyindoleacetic acid - 5-Hydroxyindoleacetic acid; 5-HTP - 5-Hydroxytryptophan; 5-HT - 5-hydroxytryptamine (serotonin); 3-MT - 3-Methoxytyramine; 3-OMD - 3-O-Methyldopa; NA - noradrenaline;  
 $p > 0.05$ , non-significant differences
